# Supplementary material for: The Masked Polar Group Incorporation (MPGI) Strategy in Drug Design: Effects of Nitrogen Substitutions on Combretastatin and Isocombretastatin Tubulin Inhibitors
Source: PubMed Central journal article supplement (PMC6930638; doi:10.3390/molecules24234319), 2019-11-26
Supplement: molecules-24-04319-s001.pdf [file molecules-24-04319-s001.pdf]

# Supplementary Material:

Table S1. Docking Results

| Comp.       | Cytotoxicity range (nM) <sup>a</sup> | SUBS <sup>b</sup> | PROT <sup>c</sup> | Zscore <sup>d</sup> | PLANTS <sup>e</sup> | AD4 <sup>f</sup> | AMBfix <sup>g</sup> | AMBmov <sup>h</sup> |
|-------------|--------------------------------------|-------------------|-------------------|---------------------|---------------------|------------------|---------------------|---------------------|
| <b>1b</b>   | >1000                                | AB                | 5H7O              | 0,81                | -68,22              |                  | -47,81              | -47,79              |
|             |                                      | AB                | 5JVD              | 0,81                |                     | -7,67            | -41,70              | -51,35              |
| <b>1c</b>   | >1000                                | AB                | 5H7O              | 0,69                | -76,69              |                  | -47,66              | -45,23              |
|             |                                      | BC                | CA4               | 0,69                |                     | -8,67            | -40,32              | -33,62              |
| <b>1d</b>   | 407-650                              | AB                | 5Z4P              | 0,78                | -61,53              |                  | -44,52              | -58,33              |
|             |                                      | AB                | CA4               | 0,78                |                     | -7,47            | -46,72              | -44,25              |
| <b>1e</b>   | >1000                                | AB                | 5H7O              | 0,72                | -84,09              |                  | -52,34              | -52,47              |
|             |                                      | AB                | 5JVD              | 0,72                |                     | -7,77            | -39,24              | -44,27              |
| <b>1f</b>   | 180-460                              | AB                | 5Z4P              | 0,92                | -66,99              |                  | -35,18              | -57,30              |
|             |                                      | AB                | 6D88              | 0,83                |                     | -7,73            | -37,62              | -48,46              |
| <b>1g</b>   | 223-387                              | AB                | 6BRY              | 0,85                |                     | -7,39            | -30,51              | -26,14              |
|             |                                      | AB                | 5NFZ              | 0,85                | -62,73              |                  | -27,51              | -51,72              |
| <b>1h</b>   | 17-71                                | ABC               | 5Z4P              | 0,72                | -76,89              |                  | -38,26              | -48,56              |
|             |                                      | BC                | 5JVD              | 0,72                |                     | -9,08            | -43,97              | -58,04              |
| <b>E-2c</b> | >1000                                | BC                | 5JVD              | 0,73                |                     | -9,80            | -39,42              | -52,93              |
|             |                                      | AB                | 5H7O              | 0,73                | -66,10              |                  | -43,25              | -44,41              |
| <b>Z-2c</b> | >1                                   | BC                | 5JVD              | 0,65                |                     | -9,93            | -44,34              | -48,96              |
|             |                                      | AB                | 5H7O              | 0,65                | -79,50              |                  | -42,94              | -46,97              |
| <b>E-2d</b> | 277-677                              | AB                | 5Z4P              | 0,77                | -54,69              |                  | -45,82              | -51,67              |
|             |                                      | AB                | 5XKH              | 0,76                |                     | -8,46            | -38,24              | -42,30              |
| <b>Z-2d</b> | 277-677                              | AB                | 5Z4P              | 0,77                | -54,39              |                  | -48,67              | -40,22              |
|             |                                      | AB                | CA4               | 0,77                |                     | -8,12            | -44,40              | -49,81              |
| <b>E-2e</b> | >1000                                | AB                | 5JVD              | 0,75                | -78,66              |                  | -46,89              | -44,95              |
|             |                                      | AB                | 5H7O              | 0,75                |                     | -8,24            | -52,00              | -51,20              |
| <b>Z-2e</b> | >1000                                | AB                | 5JVD              | 0,78                |                     | -8,42            | -34,79              | -38,30              |
|             |                                      | AB                | 5H7O              | 0,78                | -81,95              |                  | -54,10              | -53,76              |
| <b>E-2f</b> | >1000                                | AB                | 5NFZ              | 0,89                | -63,94              |                  | -31,04              | -42,53              |

|             |          |     |      |      |        |       |        |        |
|-------------|----------|-----|------|------|--------|-------|--------|--------|
|             |          | AB  | 5JVD | 0,88 |        | -8,25 | -34,03 | -45,13 |
| <b>Z-2f</b> | >1000    | AB  | 6F7C | 0,87 | -64,08 |       | -17,66 | -25,63 |
|             |          | AB  | 5JVD | 0,87 |        | -8,49 | -39,24 | -40,05 |
| <b>E-2g</b> | 407-3330 | AB  | 5XAF | 0,83 | -61,63 |       |        |        |
|             |          | AB  | CA4  | 0,83 |        | -8,03 | -34,60 | -35,89 |
| <b>Z-2g</b> | 407-3330 | AB  | 5H7O | 0,82 | -62,57 |       |        |        |
|             |          | AB  | 6BRY | 0,82 |        | -7,81 | -25,44 | -27,14 |
| <b>3b</b>   | 81-277   | AB  | 5H7O | 0,83 | -73,49 |       | -47,36 | -57,42 |
|             |          | AB  | 5JVD | 0,83 |        | -8,13 | -47,39 | -43,99 |
| <b>3c</b>   | 140-523  | BC  | 5JVD | 0,68 |        | -9,58 | -45,78 | -53,54 |
|             |          | AB  | 5H7O | 0,68 | -79,64 |       | -9,57  | -47,69 |
| <b>3d</b>   | >1000    | AB  | 5Z4P | 0,76 | -66,49 |       | -57,21 | -47,12 |
|             |          | AB  | 5H7O | 0,76 |        | -8,09 | -50,95 | -38,49 |
| <b>3e</b>   | >1000    | AB  | 5H7O | 0,75 | -86,54 |       | -52,83 | -59,52 |
|             |          | AB  | 5H7O | 0,75 |        | -7,93 | -56,12 | -53,42 |
| <b>3f</b>   | >1000    | AB  | 5Z4P | 0,90 | -73,45 |       | -41,62 | -45,56 |
|             |          | AB  | 6BRY | 0,90 |        | -7,97 | -35,02 | -44,20 |
| <b>3h</b>   | 230-477  | ABC | 5Z4P | 0,69 | -79,92 |       | -40,62 | -46,71 |
|             |          | AB  | CA4  | 0,69 |        | -9,33 | -41,32 | -45,58 |
| <b>4d</b>   | >1000    | AB  | 5Z4P | 0,82 | -67,36 |       | -44,88 | -48,65 |
|             |          | AB  | 6BRY | 0,81 |        | -7,86 | -36,79 | -47,23 |
| <b>4d</b>   | >1000    | AB  | 6F7C | 0,65 | -60,38 |       | -44,91 | -51,66 |
|             |          | AB  | 6BRY | 0,65 |        | -7,88 | -42,43 | -49,63 |
| <b>4e</b>   | >1000    | AB  | 5JVD | 0,78 | -88,48 |       | -43,83 | -53,96 |
|             |          | AB  | 5JVD | 0,78 |        | -8,19 | -44,46 | -44,70 |
| <b>4e</b>   | >1000    | AB  | 5JVD | 0,79 |        | -7,97 | -43,66 | -54,27 |
|             |          | AB  | 5Z4P | 0,79 | -91,66 |       | -50,46 | -61,24 |
| <b>4f</b>   | >1000    | AB  | 5Z4P | 0,96 | -69,96 |       | -35,32 | -45,85 |
|             |          | AB  | CA4  | 0,95 |        | -7,77 | -39,61 | -51,91 |
| <b>4f</b>   | >1000    | AB  | 5Z4P | 0,95 | -72,55 |       | -33,32 | -37,16 |

|             |         |     |       |      |        |        |        |        |
|-------------|---------|-----|-------|------|--------|--------|--------|--------|
|             |         | AB  | CA4   | 0,94 |        | -8,71  | -42,27 | -61,37 |
| <b>4g</b>   | 367-403 | AB  | 5Z4P  | 0,82 | -70,78 |        | -30,87 | -39,74 |
|             |         | AB  | 5JVD  | 0,82 |        | -7,68  | -38,38 | -39,82 |
| <b>5a</b>   | >1000   | AB  | 5JVD  | 0,74 |        | -8,73  | -11,61 | -30,41 |
|             |         | AB  | bLact | 0,74 | -56,46 |        | -21,14 | -27,39 |
| <b>5d</b>   | >1000   | AB  | 5H7O  | 0,70 | -53,67 |        | -25,27 | -46,25 |
|             |         | AB  | CA4   | 0,70 |        | -8,10  | -12,72 | -41,90 |
| <b>5e</b>   | >1000   | AB  | 5H7O  | 0,67 | -75,84 |        | -23,40 | -32,14 |
|             |         | AB  | 5H7O  | 0,67 |        | -8,28  | -19,64 | -31,91 |
| <b>E-6a</b> | >1000   | AB  | CA4   | 0,75 | -59,03 |        | -14,52 | -40,75 |
|             |         | AB  | 5JVD  | 0,75 |        | -9,31  | -14,95 | -32,97 |
| <b>Z-6a</b> | >1000   | AB  | 5H7O  | 0,72 | -61,58 |        | -27,84 | -32,08 |
|             |         | AB  | 5JVD  | 0,72 |        | -9,34  | -18,37 | -36,40 |
| <b>7a</b>   | >1000   | AB  | 5H7O  | 0,73 | -66,85 |        | -34,98 | -47,30 |
|             |         | AB  | 5JVD  | 0,73 |        | -9,17  | -22,57 | -43,51 |
| <b>7d</b>   | >1      | AB  | 5Z4P  | 0,70 | -58,48 |        |        |        |
|             |         | AB  | 5H7O  | 0,70 |        | -8,89  | -30,71 | -51,38 |
| <b>8a</b>   | 102-503 | AB  | CA4   | 0,82 | -76,61 |        | 66,82  | -27,56 |
|             |         | AB  | CA4   | 0,82 |        | -8,66  | -56,37 | -51,33 |
| <b>8b</b>   | 57-80   | AB  | 5H7O  | 0,89 | -67,33 |        | -48,23 | -54,11 |
|             |         | AB  | CA4   | 0,89 |        | -7,87  | -42,17 | -41,51 |
| <b>8c</b>   | >1000   | ABC | 5JVD  | 0,70 | -79,79 |        | -32,56 | -55,76 |
|             |         | BC  | 5JVD  | 0,70 |        | -10,07 | -50,83 | -56,07 |
| <b>8h</b>   | >1000   | AB  | 5JVD  | 0,72 |        | -9,31  | -31,21 | -43,32 |
|             |         | AB  | 5H7O  | 0,72 | -76,49 |        | -33,76 | -45,46 |
| <b>9a</b>   | >1000   | AB  | 5H7O  | 0,77 | -64,56 |        | -31,09 | -38,73 |
|             |         | AB  | CA4   | 0,77 |        | -9,03  | -25,06 | -47,86 |

**Supplementary Table 1. Docking results.** <sup>a</sup> Range of antiproliferative IC<sub>50</sub> values. <sup>b</sup> Subsites of the colchicine site occupied by the selected pose. <sup>c</sup> PDB-ID with the best docking score for the selected pose. <sup>d</sup> Z score of the selected pose within the Autodock or PLANTS scores. <sup>e</sup> PLANTS score for the selected pose. <sup>f</sup> AutoDock4 score for the selected pose. <sup>g</sup> MM-PBSA with AMBER for

the selected pose after 5 ns molecular dynamics with the protein fixed.<sup>b</sup> MM-PBSA with AMBER for the selected pose after 5 ns molecular dynamics with the protein free.
